# Supplementary material for: Cumulative asbestos exposure and mortality from asbestos related diseases in a pooled analysis of 21 asbestos cement cohorts in Italy
Source: PubMed Central journal article supplement (PMC6686495; doi:10.1186/s12940-019-0510-6), 2019-08-07
Supplement: 12940_2019_510_MOESM1_ESM.pdf [file 12940_2019_510_MOESM1_ESM.pdf]

| <b>Company or cohort name</b> | <b>Town</b>         | <b>Region</b>  | <b>Period of activity</b> | <b>Asbestos type used</b>             | <b>Asbestos used from</b> | <b>Males</b> | <b>Females</b> | <b>References</b> |
|-------------------------------|---------------------|----------------|---------------------------|---------------------------------------|---------------------------|--------------|----------------|-------------------|
| Fibronit                      | Bari                | Apulia         | 1934 - 1989               | Chrysotile, crocidolite, amosite      | 1934                      | 413          | -              | Coviello 2002     |
| Eternit                       | Naples              | Campania       | 1939 - 1986 #             | Chrysotile, crocidolite               | 1939                      | 1225         | 222            | Menegozzo 2011    |
| Artelit                       | Cadelbosco di Sopra | Emilia-Romagna | 1965 - 1987               | Chrysotile, crocidolite               | 1965                      | 49           | 1              | Luberto 2004      |
| Cemental                      | Correggio           | Emilia-Romagna | 1952 - 1989               | Chrysotile, crocidolite               | 1952                      | 473          | 75             | Luberto 2004      |
| Cemiant                       | Cadelbosco di Sopra | Emilia-Romagna | 1968 - 1991               | Chrysotile                            | 1968                      | 22           | 81             | Luberto 2004      |
| Eternit / ICAR                | Rubiera             | Emilia-Romagna | 1961 - 1992               | Chrysotile, crocidolite               | 1961                      | 484          | 69             | Luberto 2004      |
| Fibrotubi                     | Bagnolo in Piano    | Emilia-Romagna | 1957 - 1993               | Chrysotile, crocidolite               | 1957                      | 230          | 54             | Luberto 2004      |
| Itamiant                      | Castelnovo di Sotto | Emilia-Romagna | 1955 - 1993               | Chrysotile, crocidolite               | 1955                      | 884          | 303            | Luberto 2004      |
| Maranit                       | Poggio Renatico     | Emilia-Romagna | 1962 - 1993               | Chrysotile, crocidolite               | 1962                      | 184          | 17             | Luberto 2004      |
| Sidercam                      | Boretto             | Emilia-Romagna | 1969 - 1993               | Chrysotile, crocidolite               | 1969                      | 117          | 11             | Luberto 2004      |
| Superlit                      | Novi di Modena      | Emilia-Romagna | 1954 - 1993               | Chrysotile, crocidolite               | 1954                      | 169          | 6              | Luberto 2004      |
| Uprocem                       | Boretto             | Emilia-Romagna | 1973 - 1993               | Chrysotile, crocidolite               | 1973                      | 43           | 15             | Luberto 2004      |
| Cemamit                       | Ferentino           | Lazio          | 1963 - 1984               | Chrysotile, crocidolite               | 1963                      | 80           | 1              | -                 |
| Fibronit                      | Broni               | Lombardy       | 1932 - 1993 #             | Chrysotile, crocidolite, amosite      | 1932                      | 1294         | 39             | Oddone 2017       |
| Sacelit                       | Senigallia          | Marche         | 1948 - 1984               | Chrysotile, crocidolite, amosite      | 1948                      | 450          | 139            | Pettinari 1994    |
| SACA                          | Cavagnolo           | Piedmont       | 1948 - 1982               | Chrysotile, crocidolite, amosite      | 1948                      | 547          | 265            | Ferrante 2008     |
| Eternit                       | Casale Monferrato   | Piedmont       | 1907 - 1986               | Chrysotile, crocidolite               | 1907                      | 2608         | 758            | Magnani 2008      |
| Baraclit                      | Bibbiena            | Tuscany        | 1943 - active             | Chrysotile from 1945; Mixed from 1963 | 1945                      | 725          | -              | -                 |
| Fibronit                      | Avenza              | Tuscany        | 1940 - 1983               | Mixed fibres                          | 1935                      | 189          | 37             | Raffaelli 2007    |
| Veronit                       | Livorno             | Tuscany        | 1930 - 1985               | Mixed fibres                          | 1950                      | 128          | 29             | -                 |
| Edilit                        | Vigodarzere         | Veneto         | 1961 - active             | Chrysotile, crocidolite               | 1947                      | 323          | 216            | -                 |
| Workers in multiple cohorts   |                     |                |                           |                                       |                           | 77           | 24             |                   |
| <b>Total</b>                  |                     |                |                           |                                       |                           | <b>10714</b> | <b>2362</b>    |                   |

**Supplementary table 1.** Asbestos cement pooled Italian study. Summary of cohort data, including all subjects, including those with follow-up terminated before 1970.

# Restricted to workers first employed from 1950

|                                              | VIII                 | IX                   | X                            |
|----------------------------------------------|----------------------|----------------------|------------------------------|
| All causes                                   | 0000-9999            | 0001-9999            | A00-T98                      |
| Malignant neoplasm (MN)                      | 1400-2079            | 1400-2089            | C00-C97                      |
| MN of the lip, oral cavity and pharynx       | 1400-1499            | 1400-1499            | C00-C14                      |
| MN of the digestive organs (incl peritoneum) | 1500-1599, 1978-1978 | 1500-1599            | C15-C26,C45.1,C48            |
| MN of the stomach                            | 1510-1519            | 1510-1519            | C16                          |
| MN of the small intestine                    | 1520-1529            | 1520-1529            | C17                          |
| MN of the colon                              | 1530-1539            | 1530-1539            | C18                          |
| MN of the rectum                             | 1540-1549            | 1540-1549            | C19-C21                      |
| MN of the liver and intrahepatic bile ducts  | 1550-1559, 1978-1978 | 1550-1552            | C22                          |
| MN of the peritoneum                         | 1580-1589            | 1580-1589            | C48,C45.1                    |
| MN of the respiratory organs                 | 1600-1639, 1942-1942 | 1600-1659            | C30-C39, C45.0, C45.2, C45.9 |
| MN of the larynx                             | 1610-1619            | 1610-1619            | C32                          |
| MN of the lungs                              | 1620-1629            | 1620-1629            | C33-C34                      |
| MN of the pleura                             | 1630-1630            | 1630-1639            | C38.4, C45.0, C45.9          |
| MN of the uterus                             | 1800-1809, 1820-1829 | 1790-1809, 1820-1829 | C53-C55                      |
| MN of the ovaries                            | 1830-1839            | 1830-1839            | C56-C57                      |
| MN of the prostate                           | 1850-1859            | 1850-1859            | C61                          |
| MN of the bladder                            | 1880-1889            | 1880-1889            | C67                          |
| MN of the kidney                             | 1890-1899            | 1890-1899            | C64-C66,C68                  |
| Leukaemia and lymphoma                       | 2000-2079            | 2000-2089            | C81-C96                      |
| MN of unspecified site                       | 1990-1999            | 1990-1999            | C80                          |
| Psychiatric diseases                         | 2900-3199            | 2900-3199            | F00-F99                      |
| Neurological diseases                        | 3200-3589, 0660-0669 | 3200-3599            | G00-G99                      |
| Cardiovascular diseases                      | 3900-4589            | 3900-4599            | I00-I26,I28-I99              |
| Respiratory diseases                         | 4600-5199            | 4600-5199            | J00-J99                      |
| Digestive diseases                           | 5200-5799            | 5200-5799            | K00-K93                      |
| Genitourinary diseases                       | 5800-6299            | 5800-6299            | N00-N99                      |
| Asbestosis                                   | 5152-5152            | 5010-5019            | J61                          |
| Pneumoconiosis                               | 5150-5169            | 5000 - 5059          | J60- J65                     |
| Accidents and violence                       | 8000-9999            | 8000-9999            | S00-T98                      |
| Poorly specified causes                      | 7800-7963            | 7800-7998            | R00-R98                      |

**Supplementary table 2.** Asbestos cement pooled Italian study. Cause of death codes according to ICD in use at the date of death.

| Plant                       | Period      | AEI index (f/ml) | Fibre-type-weighted-AEI<br>(chrysotile equivalent f/ml) |
|-----------------------------|-------------|------------------|---------------------------------------------------------|
| Fibronit - Bari             | 1934 - 1974 | 3.9              | 55.9                                                    |
| Fibronit - Bari             | 1975 - 1980 | 0.6              | 55.9                                                    |
| Fibronit - Bari             | 1981 - 1985 | 0.4              | 8.6                                                     |
| Fibronit - Bari             | 1986 - 1989 | 0.0              | 5.3                                                     |
| Eternit - Naples            | 1950 - 1974 | 3.6              | 29.5                                                    |
| Eternit - Naples            | 1975 - 1986 | 0.9              | 7.7                                                     |
| Eternit - Naples            | 1987 - 1988 | 0.0              | 0.0                                                     |
| Artclit - Cadelbosco di S.  | 1965 - 1974 | 3.6              | 131.3                                                   |
| Artclit - Cadelbosco di S.  | 1975 - 1983 | 0.4              | 13.4                                                    |
| Artclit - Cadelbosco di S.  | 1984 - 1988 | 0.2              | 0.2                                                     |
| Cemental - Correggio        | 1952 - 1974 | 3.6              | 80.4                                                    |
| Cemental - Correggio        | 1975 - 1979 | 1.6              | 23.9                                                    |
| Cemental - Correggio        | 1980 - 1987 | 0.5              | 7.9                                                     |
| Cemental - Correggio        | 1988 - 1989 | 0.3              | 0.2                                                     |
| Cemiant - Cadelbosco di S.  | 1968 - 1974 | 3.6              | 3.6                                                     |
| Cemiant - Cadelbosco di S.  | 1975 - 1982 | 1.6              | 1.6                                                     |
| Cemiant - Cadelbosco di S.  | 1983 - 1986 | 0.3              | 0.3                                                     |
| Cemiant - Cadelbosco di S.  | 1987 - 1991 | 0.0              | 0.0                                                     |
| Eternit/ICAR - Rubiera      | 1961 - 1975 | 5.6              | 124.8                                                   |
| Eternit/ICAR - Rubiera      | 1976 - 1979 | 0.9              | 20.9                                                    |
| Eternit/ICAR - Rubiera      | 1980 - 1992 | 0.1              | 0.1                                                     |
| Fibrotubi - Bagnolo in P.   | 1957 - 1974 | 3.9              | 31.5                                                    |
| Fibrotubi - Bagnolo in P.   | 1975 - 1979 | 1.3              | 10.7                                                    |
| Fibrotubi - Bagnolo in P.   | 1980 - 1983 | 0.3              | 2.4                                                     |
| Fibrotubi - Bagnolo in P.   | 1984 - 1993 | 0.0              | 0.0                                                     |
| Itamiant - Castelnovo di S. | 1955 - 1974 | 5.0              | 109.7                                                   |
| Itamiant - Castelnovo di S. | 1975 - 1979 | 1.3              | 29.2                                                    |
| Itamiant - Castelnovo di S. | 1980 - 1986 | 0.1              | 2.7                                                     |
| Itamiant - Castelnovo di S. | 1987 - 1993 | 0.0              | 0.1                                                     |
| Maranit - Poggio Renatico   | 1962 - 1974 | 5.0              | 75.0                                                    |
| Maranit - Poggio Renatico   | 1975 - 1979 | 1.0              | 15.4                                                    |
| Maranit - Poggio Renatico   | 1980 - 1985 | 0.3              | 3.9                                                     |
| Maranit - Poggio Renatico   | 1986 - 1993 | 0.0              | 0.0                                                     |
| Sidercam - Boretto          | 1969 - 1974 | 5.0              | 22.9                                                    |
| Sidercam - Boretto          | 1975 - 1985 | 0.5              | 2.4                                                     |
| Sidercam - Boretto          | 1986 - 1993 | 0.0              | 0.0                                                     |
| Superlit - Novi di Modena   | 1954 - 1974 | 3.9              | 45.1                                                    |
| Superlit - Novi di Modena   | 1975 - 1986 | 0.5              | 6.1                                                     |
| Superlit - Novi di Modena   | 1987 - 1993 | 0.0              | 0.0                                                     |
| Uprocem - Boretto           | 1973 - 1974 | 5.0              | 57.6                                                    |
| Uprocem - Boretto           | 1975 - 1982 | 1.8              | 20.8                                                    |
| Uprocem - Boretto           | 1983 - 1984 | 0.5              | 6.1                                                     |
| Uprocem - Boretto           | 1985 - 1986 | 0.1              | 1.2                                                     |
| Uprocem - Boretto           | 1987 - 1993 | 0.0              | 0.0                                                     |
| Cemamit - Ferentino         | 1963 - 1974 | 3.6              | 29.5                                                    |
| Cemamit - Ferentino         | 1975 - 1976 | 1.6              | 12.8                                                    |
| Cemamit - Ferentino         | 1977 - 1984 | 0.5              | 4.2                                                     |
| Fibronit - Broni            | 1932 - 1974 | 3.6              | 52.4                                                    |
| Fibronit - Broni            | 1975 - 1980 | 0.3              | 4.3                                                     |
| Fibronit - Broni            | 1981 - 1986 | 0.4              | 5.3                                                     |
| Fibronit - Broni            | 1987 - 1990 | 0.2              | 0.4                                                     |
| Fibronit - Broni            | 1991 - 1993 | 0.1              | 0.1                                                     |
| Fibronit - Broni            | 1994 - 1997 | 0.0              | 0.0                                                     |
| Sacelit - Senigallia        | 1948 - 1974 | 3.9              | 31.5                                                    |
| Sacelit - Senigallia        | 1975 - 1977 | 1.0              | 8.1                                                     |
| Sacelit - Senigallia        | 1978 - 1984 | 0.3              | 2.1                                                     |
| SACA - Cavagnolo            | 1947 - 1960 | 5.0              | 109.7                                                   |
| SACA - Cavagnolo            | 1961 - 1975 | 3.9              | 59.1                                                    |
| SACA - Cavagnolo            | 1976 - 1978 | 0.5              | 4.2                                                     |

|                             |             |     |      |
|-----------------------------|-------------|-----|------|
| SACA - Cavagnolo            | 1979 - 1982 | 0.3 | 2.1  |
| SACA - Cavagnolo            | 1983 - 1983 | 0.0 | 0.0  |
| Eternit - Casale Monferrato | 1907 - 1974 | 5.5 | 78.7 |
| Eternit - Casale Monferrato | 1975 - 1986 | 0.3 | 4.3  |
| Baraclit - Bibbiena         | 1943 - 1959 | 2.1 | 2.1  |
| Baraclit - Bibbiena         | 1960 - 1974 | 0.8 | 1.4  |
| Baraclit - Bibbiena         | 1975 - 1980 | 0.2 | 0.4  |
| Baraclit - Bibbiena         | 1981 - 1984 | 0.0 | 0.1  |
| Baraclit - Bibbiena         | 1985 - 2001 | 0.0 | 0.0  |
| Fibronit - Avenza           | 1935 - 1974 | 5.0 | 40.3 |
| Fibronit - Avenza           | 1975 - 1978 | 4.3 | 34.9 |
| Fibronit - Avenza           | 1979 - 1985 | 1.8 | 14.6 |
| Fibronit - Avenza           | 1986 - 1988 | 0.0 | 0.0  |
| Veronit - Livorno           | 1950 - 1961 | 6.2 | 50.1 |
| Veronit - Livorno           | 1962 - 1979 | 6.1 | 49.5 |
| Veronit - Livorno           | 1980 - 1989 | 2.0 | 16.1 |
| Edilit - Vigodarzere        | 1946 - 1974 | 3.6 | 22.9 |
| Edilit - Vigodarzere        | 1975 - 1984 | 0.9 | 5.9  |
| Edilit - Vigodarzere        | 1985 - 1994 | 0.0 | 0.2  |
| Edilit - Vigodarzere        | 1995 - 2006 | 0.0 | 0.0  |

**Supplementary table 3.** Asbestos cement pooled Italian study. Average asbestos exposure index, crude and adjusted for carcinogenic potency of asbestos types used. See text.

---

| <b>Age class</b> | <b>Males</b>  | <b>Females</b> | <b>Total</b>  |
|------------------|---------------|----------------|---------------|
| 10-19            | 1472          | 274            | 1746          |
| 20-29            | 19006         | 3392           | 22398         |
| 30-39            | 43011         | 9779           | 52790         |
| 40-49            | 67871         | 16424          | 84295         |
| 50-59            | 75232         | 18312          | 93544         |
| 60-69            | 60825         | 16916          | 77741         |
| 70-79            | 33475         | 10768          | 44243         |
| 80-89            | 8273          | 3126           | 11399         |
| 90+              | 509           | 250            | 759           |
| <b>Total</b>     | <b>309674</b> | <b>79241</b>   | <b>388915</b> |

---

**Supplementary table 4.** Asbestos cement pooled Italian study. Person-years at risk by gender and age class.

OBS: observed; EXP: expected; SMR: standardized mortality ratio; CI: confidence interval. \* p < 0.05; \*\* p < 0.01.

|                               |      | Duration of employment   |      |                            |      |                            |     |                            |  |
|-------------------------------|------|--------------------------|------|----------------------------|------|----------------------------|-----|----------------------------|--|
| MALES                         |      | 0-9                      |      | 10-19                      |      | 20-29                      |     | 30+                        |  |
| Cause of death                | n    | SMR (95% CI)             | n    | SMR (95% CI)               | n    | SMR (95% CI)               | n   | SMR (95% CI)               |  |
| All causes                    | 2268 | 1.16** (1.11-1.21)       | 1499 | 1.25** (1.18-1.31)         | 1347 | 1.30** (1.24-1.38)         | 477 | 1.31** (1.19-1.43)         |  |
| Malignant neoplasm            | 910  | 1.30** (1.22-1.39)       | 626  | 1.52** (1.40-1.64)         | 607  | 1.68** (1.54-1.81)         | 199 | 1.71** (1.48-1.97)         |  |
| MN stomach                    | 68   | 1.13 (0.88-1.43)         | 32   | 0.85 (0.58-1.20)           | 26   | 0.83 (0.54-1.22)           | 10  | 0.96 (0.46-1.77)           |  |
| MN colon                      | 46   | 1.01 (0.74-1.34)         | 39   | 1.51* (1.07-2.06)          | 20   | 0.86 (0.53-1.33)           | 12  | 1.60 (0.83-2.80)           |  |
| MN rectum                     | 17   | 0.86 (0.50-1.37)         | 9    | 0.76 (0.35-1.44)           | 13   | 1.24 (0.66-2.12)           | 1   | 0.27 (0.01-1.52)           |  |
| MN peritoneum retroperitoneum | 22   | 6.66** (4.18-10.09)      | 24   | 13.12** (8.41-19.52)       | 36   | 23.06** (16.15-31.93)      | 20  | 40.48** (24.73-62.51)      |  |
| MN respiratory organs         | 436  | 1.80** (1.65-1.98)       | 312  | 2.16** (1.93-2.42)         | 334  | 2.64** (2.36-2.94)         | 102 | 2.59** (2.11-3.15)         |  |
| MN larynx                     | 27   | 1.55* (1.02-2.26)        | 9    | 0.77 (0.35-1.47)           | 12   | 1.24 (0.64-2.17)           | 2   | 0.64 (0.08-2.32)           |  |
| MN lung                       | 307  | 1.42** (1.27-1.59)       | 229  | 1.80** (1.57-2.04)         | 217  | 1.93** (1.68-2.21)         | 67  | 1.92** (1.49-2.44)         |  |
| MN pleura                     | 97   | 15.45** (12.53-18.85)    | 71   | 21.74** (16.98-27.43)      | 104  | 32.87** (26.86-39.83)      | 33  | 35.06** (24.13-49.23)      |  |
| Respiratory diseases          | 169  | 1.40* (1.19-1.62)        | 197  | 2.34** (2.02-2.69)         | 221  | 3.00** (2.62-3.42)         | 92  | 3.19** (2.57-3.91)         |  |
| Bronchitis, emphysema, asthma | 71   | 1.54** (1.20-1.94)       | 39   | 1.05 (0.74-1.43)           | 35   | 1.15 (0.80-1.61)           | 5   | 0.37* (0.12-0.86)          |  |
| Asbestosis                    | 35   | 135.60** (94.45-188.59)  | 105  | 635.35** (519.64-769.14)   | 134  | 720.32** (630.52-853.13)   | 74  | 964.89** (757.65-1211.33)  |  |
| Cardiovascular diseases       | 635  | 0.94 (0.86-1.01)         | 375  | 0.84** (0.76-0.93)         | 314  | 0.82** (0.73-0.91)         | 120 | 0.82* (0.68-0.98)          |  |
| Digestive diseases            | 122  | 1.03 (0.86-1.23)         | 81   | 1.03 (0.82-1.28)           | 56   | 0.89 (0.677-1.16)          | 17  | 0.78* (0.46-1.25)          |  |
| Accidents and violence        | 133  | 1.07 (0.90-1.27)         | 45   | 0.80 (0.58-1.07)           | 26   | 0.63* (0.41-0.92)          | 17  | 1.31 (0.76-2.10)           |  |
| FEMALES                       |      | 0-9                      |      | 10-19                      |      | 20-29                      |     | 30+                        |  |
| Causes of death               | n    | SMR (95% CI)             | n    | SMR (95% CI)               | n    | SMR (95% CI)               | n   | SMR (95% CI)               |  |
| All causes                    | 428  | 1.22** (1.10-1.34)       | 265  | 1.34** (1.18-1.51)         | 223  | 1.46** (1.28-1.67)         | 119 | 1.74** (1.44-2.08)         |  |
| Malignant neoplasm            | 171  | 1.39** (1.19-1.61)       | 105  | 1.80** (1.47-2.18)         | 84   | 1.97** (1.57-2.43)         | 54  | 2.89** (2.17-3.77)         |  |
| MN stomach                    | 13   | 1.71 (0.91-2.92)         | 3    | 0.70 (0.15-2.05)           | 5    | 1.49 (0.48-3.47)           | 1   | 0.69 (0.02-3.86)           |  |
| MN colon                      | 11   | 1.11 (0.56-1.99)         | 8    | 1.64 (0.71-3.22)           | 6    | 1.62 (0.59-3.52)           | 1   | 0.61 (0.02-3.42)           |  |
| MN rectum                     | 3    | 0.82 (0.17-2.40)         | 6    | 3.14* (1.15-6.84)          | 1    | 0.67 (0.02-3.74)           | 1   | 1.44 (0.04-8.01)           |  |
| MN peritoneum retroperitoneum | 3    | 3.01 (0.62-8.81)         | 13   | 25.77** (13.72-44.06)      | 9    | 23.84** (10.90-45.25)      | 6   | 35.39** (12.99-77.02)      |  |
| MN respiratory organs         | 50   | 3.59** (2.67-4.74)       | 31   | 5.15** (3.50-7.32)         | 28   | 6.65** (4.42-9.62)         | 21  | 11.68** (7.23-17.85)       |  |
| MN larynx                     | 1    | 3.14 (0.08-17.47)        | -    | -                          | 1    | 9.13 (0.23-50.90)          | -   | -                          |  |
| MN lung                       | 21   | 1.70* (1.05-2.60)        | 8    | 1.52 (0.66-2.99)           | 3    | 0.82 (0.17-2.40)           | 6   | 3.90* (1.43-8.49)          |  |
| MN pleura                     | 27   | 29.33** (19.33-42.67)    | 23   | 53.14** (33.69-79.74)      | 24   | 71.32** (45.70-106.12)     | 15  | 93.49** (52.32-154.19)     |  |
| MN ovary                      | 6    | 0.89 (0.33-1.94)         | 5    | 1.71 (0.55-3.98)           | 4    | 1.89 (0.52-4.83)           | 4   | 4.38* (1.19-11.21)         |  |
| Respiratory diseases          | 28   | 1.73** (1.15-2.50)       | 23   | 2.31** (1.46-3.47)         | 26   | 3.38** (2.21-4.95)         | 15  | 4.27** (2.39-7.05)         |  |
| Bronchitis, emphysema, asthma | 9    | 2.24* (1.02-4.25)        | 4    | 1.36 (0.37-3.48)           | -    | -                          | 3   | 2.53 (0.52-7.41)           |  |
| Asbestosis                    | 9    | 414.39** (189.47-786.64) | 16   | 1259.69** (719.99-2045.66) | 15   | 1543.29** (863.73-2545.40) | 11  | 1930.91** (963.87-3454.92) |  |
| Cardiovascular diseases       | 125  | 1.00 (0.84-1.20)         | 91   | 1.10 (0.89-1.36)           | 55   | 0.82 (0.62-1.07)           | 36  | 1.17 (0.82-1.62)           |  |
| Digestive diseases            | 25   | 1.32 (0.85-1.95)         | 12   | 1.15 (0.60-2.01)           | 6    | 0.79 (0.29-1.71)           | 2   | 0.57 (0.07-2.07)           |  |
| Accidents and violence        | 16   | 1.14 (0.65-1.85)         | 11   | 1.57 (0.79-2.81)           | 4    | 0.75 (0.20-1.91)           | 4   | 1.73 (0.47-4.43)           |  |

**Supplementary table 5:** Asbestos cement pooled Italian study. Mortality by gender and duration of employment for selected causes of death.

Obs.: observed; SMR: standardized mortality ratio; 95%CI: confidence intervals; \* p < 0.05; \*\* p < 0.01.

| MALES                                |     | ≤ 1949                 |      | 1950-9                |      | 1960-9                |     | 1970-9                |     | 1980-9               |   | 1990+            |  |
|--------------------------------------|-----|------------------------|------|-----------------------|------|-----------------------|-----|-----------------------|-----|----------------------|---|------------------|--|
| Causes of death                      | n   | SMR (95% CI)           | n    | SMR (95% CI)          | n    | SMR (95% CI)          | n   | SMR (95% CI)          | n   | SMR (95% CI)         | n | SMR (95% CI)     |  |
| All causes                           | 926 | 1.38** (1.30-1.48)     | 1679 | 1.24** (1.18-1.30)    | 2180 | 1.18** (1.13-1.23)    | 575 | 1.11* (1.02-1.21)     | 224 | 1.37** (1.20-1.57)   | 7 | 1.33 (0.53-2.73) |  |
| Malignant neoplasm                   | 340 | 1.83** (1.64-2.03)     | 692  | 1.57** (1.46-1.69)    | 953  | 1.37** (1.28-1.46)    | 266 | 1.32** (1.16-1.48)    | 91  | 1.47** (1.19-1.81)   | - | -                |  |
| MN of stomach                        | 22  | 1.08 (0.68-1.64)       | 28   | 0.73 (0.48-1.05)      | 58   | 0.97 (0.74-1.25)      | 19  | 1.16 (0.70-1.82)      | 9   | 1.93 (0.88-3.66)     | - | -                |  |
| MN of colon                          | 22  | 1.76* (1.10-2.66)      | 29   | 1.09 (0.73-1.57)      | 45   | 0.99 (0.73-1.33)      | 14  | 1.03 (0.56-1.72)      | 7   | 1.68 (0.68-3.46)     | - | -                |  |
| MN of rectum                         | 8   | 1.13 (0.49-2.23)       | 11   | 0.88 (0.44-1.58)      | 17   | 0.89 (0.52-1.42)      | 3   | 0.55 (0.11-1.59)      | 1   | 0.60 (0.02-3.37)     | - | -                |  |
| MN of peritoneum and retroperitoneum | 23  | 26.88** (17.04-40.34)  | 46   | 25.28** (18.51-33.72) | 29   | 9.04** (6.06-12.99)   | 4   | 4.06* (1.11-10.41)    | -   | -                    | - | -                |  |
| MN of respiratory organs             | 155 | 2.69** (2.28-3.14)     | 381  | 2.45** (2.21-2.71)    | 484  | 1.96** (1.79-2.14)    | 121 | 1.71** (1.42-2.04)    | 43  | 2.06** (1.49-2.77)   | - | -                |  |
| MN of larynx                         | 7   | 1.23 (0.49-2.53)       | 11   | 0.87 (0.43-1.55)      | 25   | 1.42 (0.92-2.10)      | 4   | 0.88 (0.24-2.26)      | 3   | 2.39 (0.49-6.99)     | - | -                |  |
| MN of the lung                       | 112 | 2.26** (1.86-2.72)     | 273  | 1.99** (1.76-2.24)    | 324  | 1.47** (1.31-1.64)    | 84  | 1.33* (1.06-1.64)     | 27  | 1.44 (0.95-2.09)     | - | -                |  |
| MN of pleura                         | 35  | 23.44** (16.33-32.61)  | 94   | 28.08** (22.69-34.36) | 132  | 21.20** (17.74-25.14) | 33  | 17.00** (11.70-23.88) | 11  | 17.75** (8.86-31.77) | - | -                |  |
| Respiratory diseases                 | 189 | 3.34** (2.88-3.85)     | 222  | 2.14** (1.87-2.44)    | 228  | 2.00** (1.75-2.28)    | 31  | 1.16 (0.79-1.64)      | 9   | 1.37 (0.63-2.61)     | - | -                |  |
| Bronchitis, emphysema, asthma        | 17  | 0.60* (0.35-0.96)      | 54   | 1.11 (0.83-1.44)      | 67   | 1.65** (1.28-2.10)    | 9   | 1.15 (0.53-2.18)      | 3   | 1.85 (0.38-5.40)     | - | -                |  |
| Asbestosis                           | 124 | 925.4** (769.6-1103.2) | 120  | 520.2** (431.3-622.0) | 94   | 365.1** (295.1-446.8) | 9   | 180.4** (82.4-342.2)  | 1   | 72.8* (1.8-405.8)    | - | -                |  |
| Cardiovascular diseases              | 247 | 0.84** (0.74-0.95)     | 447  | 0.85** (0.78-0.94)    | 548  | 0.86** (0.79-0.94)    | 152 | 0.94 (0.80-1.11)      | 49  | 1.13 (0.84-1.50)     | 1 | 0.91 (0.02-5.09) |  |
| Digestive diseases                   | 40  | 0.97 (0.69-1.32)       | 87   | 0.97 (0.78-1.20)      | 103  | 0.91 (0.74-1.11)      | 35  | 1.20 (0.84-1.68)      | 11  | 1.27 (0.64-2.28)     | - | -                |  |
| Accidents and violence               | 32  | 1.25 (0.86-1.77)       | 32   | 0.60** (0.41-0.84)    | 100  | 1.03 (0.84-1.26)      | 35  | 0.92 (0.64-1.27)      | 19  | 0.98 (0.59-1.54)     | 3 | 2.82 (0.58-8.23) |  |

  

| FEMALES                              |     | ≤ 1949                  |     | 1950-9                 |     | 1960-9                |    | 1970-9                 |    | 1980-9              |   | 1990+                  |  |
|--------------------------------------|-----|-------------------------|-----|------------------------|-----|-----------------------|----|------------------------|----|---------------------|---|------------------------|--|
| Causes of death                      | n   | SMR (95% CI)            | n   | SMR (95% CI)           | n   | SMR (95% CI)          | n  | SMR (95% CI)           | N  | SMR (95% CI)        | n | SMR (95% CI)           |  |
| All causes                           | 408 | 1.43** (1.29-1.57)      | 398 | 1.35** (1.22-1.49)     | 168 | 1.16 (0.99-1.35)      | 49 | 1.42* (1.05-1.88)      | 11 | 1.13 (0.56-2.02)    | 1 | 25.43 (0.64-141.70)    |  |
| Malignant neoplasm                   | 153 | 2.18** (1.85-2.55)      | 164 | 1.64** (1.40-1.91)     | 73  | 1.40** (1.09-1.76)    | 17 | 1.10 (0.64-1.76)       | 6  | 1.26 (0.46-2.75)    | 1 | 62.88* (1.57-350.39)   |  |
| MN of stomach                        | 6   | 1.05 (0.39-2.29)        | 9   | 1.43 (0.65-2.71)       | 4   | 1.12 (0.31-2.87)      | 2  | 2.26 (0.27-8.17)       | 1  | 3.85 (0.10-21.43)   | - | -                      |  |
| MN of colon                          | 10  | 1.58 (0.76-2.91)        | 12  | 1.50 (0.78-2.63)       | 4   | 0.94 (0.26-2.40)      | -  | -                      | -  | -                   | - | -                      |  |
| MN of rectum                         | 6   | 2.25 (0.83-4.90)        | 4   | 1.33 (0.36-3.39)       | 1   | 0.65 (0.02-3.64)      | -  | -                      | -  | -                   | - | -                      |  |
| MN of peritoneum and retroperitoneum | 20  | 31.16** (19.03-48.12)   | 9   | 11.04** (5.05-20.95)   | 1   | 2.29 (0.06-12.77)     | 1  | 8.37 (0.21-46.66)      | -  | -                   | - | -                      |  |
| MN of respiratory organs             | 39  | 6.07** (4.32-8.30)      | 55  | 5.09** (3.83-6.62)     | 29  | 4.77** (3.19-6.85)    | 5  | 2.51 (0.82-5.86)       | 2  | 3.21 (0.39-11.60)   | - | -                      |  |
| MN of larynx                         | -   | -                       | 1   | 3.83 (0.10-21.32)      | 1   | 7.43 (0.19-41.39)     | -  | -                      | -  | -                   | - | -                      |  |
| MN of the lung                       | 9   | 1.65 (0.76-3.14)        | 21  | 2.20** (1.36-3.37)     | 7   | 1.28 (0.52-2.64)      | -  | -                      | 1  | 1.75 (0.04-9.75)    | - | -                      |  |
| MN of pleura                         | 30  | 49.48** (33.38-70.63)   | 32  | 41.51** (28.40-58.60)  | 21  | 60.76** (37.61-92.87) | 5  | 49.19** (15.97-114.79) | 1  | 38.57 (0.96-214.92) | - | -                      |  |
| MN of the ovaries                    | 8   | 2.43* (1.05-4.79)       | 7   | 1.32 (0.53-2.73)       | 3   | 1.04 (0.21-3.03)      | -  | -                      | -  | -                   | 1 | 1034.3** (25.9-5763.3) |  |
| Respiratory diseases                 | 51  | 3.27** (2.44-4.30)      | 30  | 2.22** (1.50-3.17)     | 8   | 1.20 (0.52-2.37)      | 2  | 1.55 (0.19-5.61)       | 1  | 3.39 (0.09-18.92)   | - | -                      |  |
| Bronchitis, emphysema, asthma        | 4   | 0.79 (0.22-2.03)        | 9   | 2.44* (1.12-4.63)      | 3   | 1.94 (0.40-5.68)      | -  | -                      | -  | -                   | - | -                      |  |
| Asbestosis                           | 33  | 1451.3** (999.0-2038.1) | 14  | 772.4** (422.3-1295.9) | 3   | 447.7** (92.4-1308.4) | 1  | 541.5** (13.5-3017.3)  | -  | -                   | - | -                      |  |
| Cardiovascular diseases              | 126 | 0.93 (0.78-1.11)        | 110 | 1.01 (0.83-1.22)       | 53  | 1.05 (0.79-1.38)      | 16 | 1.79* (1.02-2.90)      | 2  | 1.05 (0.13-3.81)    | - | -                      |  |
| Digestive diseases                   | 10  | 0.72 (0.34-1.32)        | 19  | 1.11 (0.67-1.73)       | 14  | 1.93* (1.06-3.24)     | 2  | 1.18 (0.14-4.25)       | -  | -                   | - | -                      |  |
| Accidents and violence               | 10  | 1.01 (0.48-1.85)        | 8   | 0.78 (0.34-1.53)       | 10  | 1.73 (0.83-3.19)      | 6  | 3.23* (1.19-7.04)      | 1  | 1.27 (0.03-7.08)    | - | -                      |  |

**Supplementary table 6.** Asbestos cement pooled Italian study. Mortality by gender and period of first exposure for selected causes of death.

Obs.: observed; SMR: standardised mortality ratio; CI: confidence intervals; \* p < 0.05; \*\* p < 0.01.
